# Supplementary material
Source: publisher site journal article supplement (https://www.kjim.org/upload/media/kjim-2021-028-suppl1.pdf)
Supplement: Supplementary file 1 [file kjim-2021-028-suppl1.pdf]

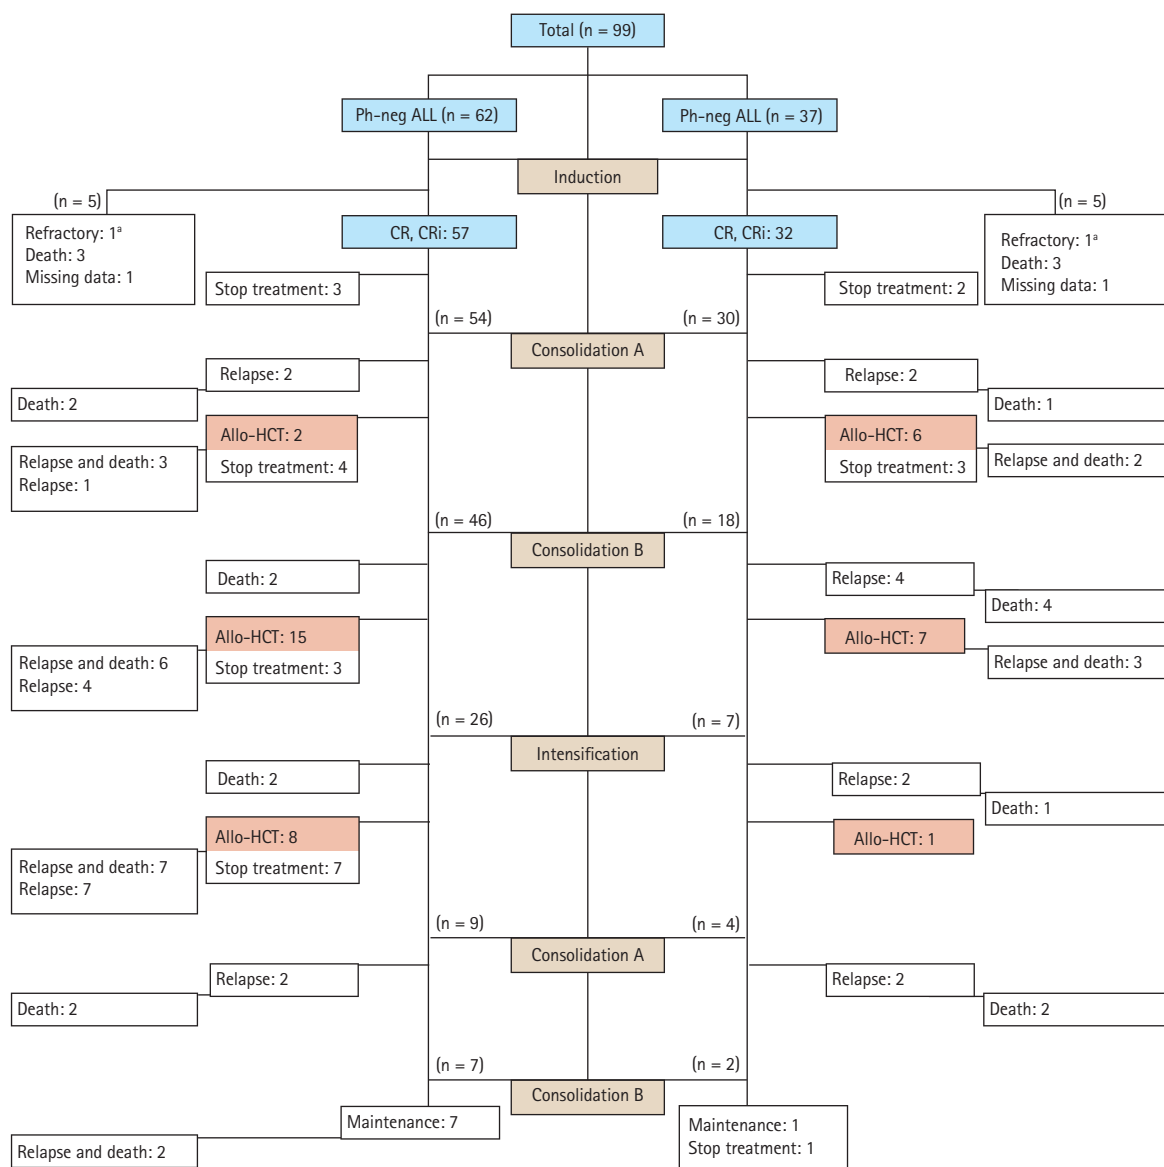

**Supplementary Figure 1.** Patients' flowchart. Ph-neg, Philadelphia negative; ALL, acute lymphoblastic leukemia; Ph-pos, Philadelphia positive; CR, complete remission; CRi, complete remission with incomplete hematologic recovery; Allo-HCT, allogeneic hematopoietic cell transplantation. <sup>a</sup>Death during salvage chemotherapy.
